# Supplementary material for: Facile approach of Ni/C composites from Ni/cellulose composites as broadband microwave absorbing materials
Source: Royal Society of Chemistry journal article supplement (doi:10.1039/c7ra04796g), 2017-01-01
Supplement: c7ra04796g1.pdf [file c7ra04796g1.pdf]

## Support Informations

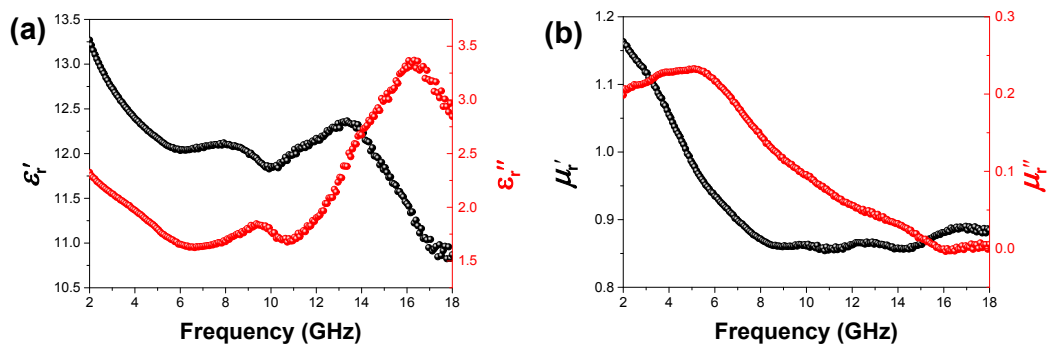

**Fig. S1.** The complex permittivity and permeability of Ni/C-paraffin composites.

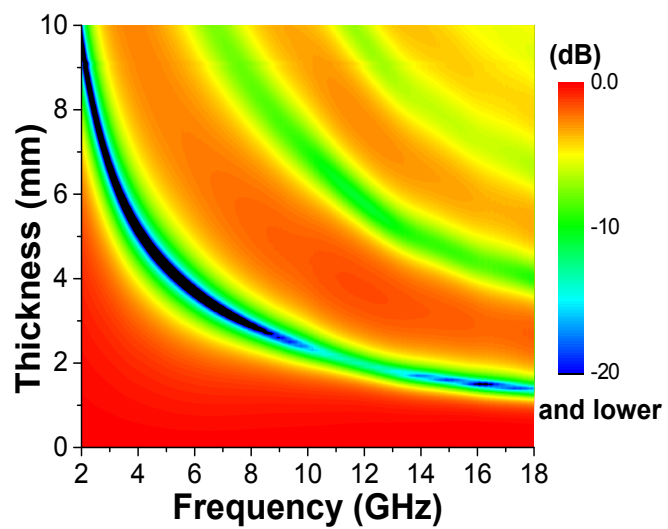

**Fig. S2.** The two-dimensional (2D) plot of microwave absorption ( $RL$ ) of the Ni/C-paraffin composites.
